1 The genome of *Salmacisia buchloëana*, the parasitic puppetmaster pulling strings of sexual  
2 phenotypic monstrosities in buffalograss

3

4 Christopher W. Benson<sup>1,2</sup>, Matthew R. Sheltra<sup>1,2</sup>, David R. Huff<sup>1\*</sup>

5

6 <sup>1</sup>Department of Plant Science, Pennsylvania State University, University Park, PA, USA

7 <sup>2</sup>Intercollegiate Graduate Degree Program in Plant Biology, Pennsylvania State University,  
8 University Park, PA, USA

9 \*Author for Correspondence: David R. Huff, Department of Plant Science, Pennsylvania State  
10 University, University Park, PA, USA, 814-574-5305, [drh15@psu.edu](mailto:drh15@psu.edu)

11

12

13 **Keywords**

14 Extended phenotype, *Tilletia*, *Bouteloua dactyloides*, smut fungi, fungal pathogen, host  
15 manipulation

16

17

18

19

20

21

22

23

24

25

26

27

28

29

30

31 **Abstract**

32 To complete its parasitic lifecycle, *Salmacisia buchloëana*, a biotrophic fungus, manipulates  
33 reproductive organ development, meristem determinacy, and resource allocation in its dioecious  
34 plant host, buffalograss (*Bouteloua dactyloides*; Poaceae). To gain insight into *S. buchloëana*'s  
35 ability to manipulate its host, we sequenced and assembled the 20.1 Mb genome of *S.*  
36 *buchloëana* into 22 chromosome-level pseudomolecules. Phylogenetic analysis suggests that *S.*  
37 *buchloëana* is nested within the genus *Tilletia* and diverged from *T. caries* and *T. walkeri* ~40  
38 million years ago. We find that *S. buchloëana* has a novel chromosome arm with no syntenic  
39 relationship to other publicly available *Tilletia* genomes and that genes on the novel arm are  
40 upregulated upon infection, suggesting that this unique chromosomal segment may have played a  
41 critical role in *S. buchloëana*'s evolution and host specificity. *Salmacisia buchloëana* has one of  
42 the largest fractions of serine peptidases (1.53% of the proteome) and one of the highest GC  
43 contents (62.3%) in all classified fungi. Analysis of codon base composition indicated that GC  
44 content is controlled more by selective constraints than directional mutation and that *S.*  
45 *buchloëana* has a unique bias for the serine codon UCG. Finally, we identify three inteins within  
46 the *S. buchloëana* genome, two of which are located in a gene often used in fungal taxonomy.  
47 The genomic and transcriptomic resources generated here will aid plant pathologists and  
48 breeders by providing insight into the extracellular components contributing to sex determination  
49 in dioecious grasses.

50

51

52

53

54

55

56

57

58

59

60

61

## 62 Introduction

63 *Salmacisia buchloëana* Huff & Chandra (syn. *Tilletia buchloëana* Kellerman & Swingle) is a  
64 fungal biotroph that spends most of its lifecycle growing intercellularly in its plant host,  
65 buffalograss (*Bouteloua dactyloides* [Nutt.] Columbus; syn. *Buchloë dactyloides* [Nutt.]  
66 Engelmann). *Salmacisia buchloëana* completes its lifecycle by producing teliospores in  
67 buffalograss ovaries, but because buffalograss is dioecious, the reproductive capacity of the  
68 fungus is restricted to only those plants with female floral anatomy (*i.e.*, half of the host  
69 population). To mitigate this reproductive bottleneck, *S. buchloëana* has evolved to induce  
70 female floral organs (stigmas, styles, ovaries) in the flowers of genetically male buffalograss for  
71 the purpose of teliospore production and ultimately completion of its lifecycle (Chandra and  
72 Huff, 2008). In this way, *S. buchloëana* hijacks the genetic machinery involved with floral  
73 development in its grass host to further its own reproductive potential (Fig. 1).

74

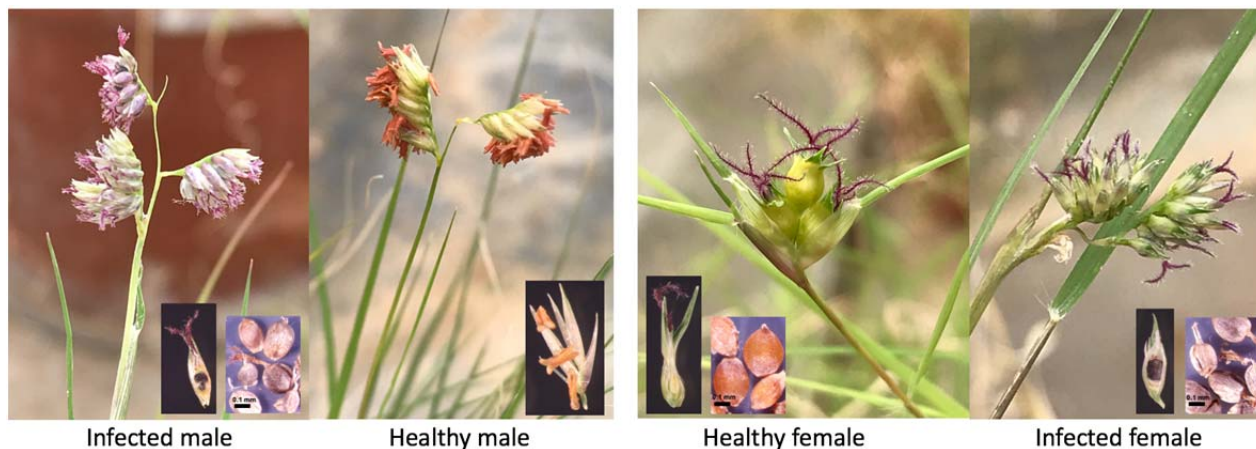

75 **Fig. 1 | Dioecious buffalograss either infected with *Salmacisia buchloëana* or healthy (mock-**  
76 **infected).** Infection with *S. buchloëana* induces the development of female floral organs (pistils)  
77 in the flowers of male plants. Pistils and stamens are easily visible with their purple feathery  
78 stigmas and orange anthers, respectively. The inset images in the bottom corners show  
79 buffalograss florets and ovaries. Healthy males do not produce ovaries, so are not depicted. The  
80 fungal-induced ovaries of infected plants are filled with teliospores and mature into ‘bunt balls’  
81 that are, on average, smaller than seed from uninfected female ovaries (scale bar = 0.1 mm).

82

83 Dioecious buffalograss with unisexual floral arrangement likely evolved from a hermaphroditic  
84 ancestor with bisexual flowers (Kinney *et al.*, 2007). As a result, unisexual buffalograss flowers  
85 contain nonfunctional rudiments of the opposite floral organ (*i.e.*, vestigial stamens in female  
86 plants and pistil primordia in male plants; Chandra and Huff, 2010). Infection with *S.*  
87 *buchloëana* overrides buffalograss' unisexual reproductive biology to induce the development of  
88 the otherwise aborted floral organs, resulting in a bisexual flower (Chandra and Huff, 2008). The  
89 induced ovaries of male plants are easily visible and play an important role in *S. buchloëana*'s  
90 reproductive lifecycle, but the induced stamens of female plants are underdeveloped and are not  
91 involved in sporulation, suggesting that they may be an off-target byproduct of fungal  
92 manipulation (Chandra and Huff, 2010). In addition to manipulating floral architecture, Chandra  
93 and Huff (2014), found that *S. buchloëana* influences broad physiological traits in its host,  
94 including resource partitioning and meristem determinacy with infected plants having increased  
95 sexual allocation at the expense of vegetative allocation. It is unclear if multiple buffalograss  
96 traits are specifically targeted by *S. buchloëana* (*i.e.*, multidimensional phenotypes; Thomas *et*  
97 *al.*, 2010; van Houte, Ros, and van Oers 2013; Poulin 2013; Cézilly *et al.*, 2013), or if the fungus  
98 manipulates a single trait and other phenotypes are incidental costs of manipulation. In either  
99 case, the altered phenotypes of buffalograss are the result of manipulation by *S. buchloëana* and  
100 therefore represent the 'extended phenotype' of *S. buchloëana* (Vyas, 2015; Dawkins, 2016;  
101 Henry *et al.*, 2021).

102  
103 *Salmacisia* is a monotypic genus and falls within the order Tilletiales (Basidiomycota,  
104 Ustilaginomycotina, Exobasidiomycetes) that includes ca. 191 species of fungi, many of which  
105 produce teliospores in the ovaries of their grass (Poaceae) hosts (He *et al.*, 2019). Species in the  
106 Tilletiales are characterized by forming dark pigmented spores with a pungent odor and  
107 commonly referred to as 'smut fungi'. To our knowledge, *S. buchloëana* is the only species  
108 within the Tilletiales known to infect a dioecious host and thereby, the only Tilletiales to induce  
109 ovaries in male plants. Infection with *S. buchloëana* is uncommon in nature but has been  
110 reported throughout the southern Great Plains of the United States and central Mexico (Huff *et*  
111 *al.*, 1987).

112

113 Here, we compare the genomic features of fungi in the Tilletiales to identify novel components  
114 of the *S. buchloëana* genome that might play a role in its unique ability to manipulate host sex  
115 organ identity and other extended phenotypes. The findings and genomic resources presented  
116 here will guide further analyses into the fine-tuned regulatory pathways associated with sex  
117 manipulation in the *Salmacisia*-buffalograss pathosystem.

118

## 119 **Results**

### 120 **Genome assembly and annotation**

121 The OK1 strain of *S. buchloëana* was sequenced to 51× coverage using the PacBio Sequel  
122 system. The Canu genome assembly (Koren *et al.*, 2017) resulted in 30 contigs, two of which  
123 were circular and six were singletons (represented by one sequence). One of the circular contigs  
124 was identified as the complete 86,026 bp mitochondrial genome (Supplementary Fig. 1) and the  
125 other aligned to a PacBio internal control and was subsequently removed. The six singletons  
126 were independently aligned to the 22 remaining contigs to check for their representation in the  
127 consensus contigs. All six singletons shared >97% sequence identity to the consensus contigs  
128 and were removed from the assembly. The 22 remaining contigs ranged between 0.54 to 1.46 Mb  
129 in length (Supplementary Table 1) and were similar in size and structure to the full-length  
130 chromosomes of model fungi, *Ustilago maydis* (Kämper *et al.*, 2006) and *U. bromivora* (Rabe *et*  
131 *al.*, 2006).

132

133 We used the Benchmarking Universal Single-Copy Orthologs (BUSCO) software to scan for  
134 conserved fungal genes and found that the genome contained 95.8% of the 1,335 single-copy  
135 orthologs in the Basidiomycota, suggesting that the 22 scaffolds represent the chromosome-level  
136 pseudomolecules of *S. buchloëana* (Table 1). In addition, we scanned for telomeric repeat  
137 sequences at the ends of *S. buchloëana* pseudomolecules to further validate the chromosome-  
138 level assembly. Plant, mammal, and fungal chromosomes typically end in (TTAGGG)<sub>n</sub> repeats  
139 (Meyne *et al.*, 1990; Wu *et al.*, 2010). We found that 18 of the 22 *S. buchloëana* chromosomes  
140 contained canonical (TTAGGG)<sub>n</sub>-3' telomeric repeat sequences at both ends while the  
141 remaining 4 pseudomolecules possessed telomeric repeats at one end, further suggesting that the  
142 genome assembly spans the near full length of *S. buchloëana*'s chromosomes (Supplementary  
143 Table 1).

144

145 **Table 1 | Genomic features of *Salmacisia buchloëana* compared to related fungal genomes.**

146 † Simple sequence repeats (SSRs)

147 ‡ Classical and non-classical

| Genomes:<br>NCBI WGS ID            | <i>S. buchloëana</i><br>MOEQ01 | <i>T. horrida</i><br>LAXH01 | <i>T. caries</i><br>LWDD01 | <i>T. controversa</i><br>LWDE01 | <i>T. laevis</i><br>RDSF01 | <i>T. indica</i><br>LWDF01 | <i>T. walkeri</i><br>LWDG01 | <i>U. maydis</i><br>AACP02 |
|------------------------------------|--------------------------------|-----------------------------|----------------------------|---------------------------------|----------------------------|----------------------------|-----------------------------|----------------------------|
| Size (Mb)                          | 20.1                           | 20.1                        | 29.5                       | 28.8                            | 28.8                       | 30.4                       | 23.3                        | 19.7                       |
| Scaffold No.                       | 22                             | 767                         | 2,888                      | 3,586                           | 3,961                      | 1,666                      | 972                         | 27                         |
| Scaffold N50 (bp)                  | 901,006                        | 75,652                      | 32,675                     | 14,841                          | 13,920                     | 83,419                     | 59,453                      | 884,984                    |
| BUSCO of genome                    | 93.6                           | 93.9                        | 93.1                       | 92.4                            | 92.5                       | 93.4                       | 94.6                        | 99.3                       |
| % GC                               | 62.3                           | 55.8                        | 56.4                       | 56.9                            | 56.6                       | 54.5                       | 54.9                        | 54.0                       |
| Protein coding genes               | 6,379                          | 6,108                       | 10,204                     | 9,860                           | 9,799                      | 9,548                      | 7,970                       | 6,782                      |
| BUSCO of protein annotation        | 95.8                           | 88.7                        | 96.6                       | 95.9                            | 96.3                       | 97.1                       | 97.4                        | 99.6                       |
| tRNAs                              | 56                             | 77                          | 78                         | 80                              | 102                        | 68                         | 65                          | 102                        |
| Gene density (#/Mb)                | 317                            | 303                         | 346                        | 342                             | 340                        | 314                        | 342                         | 344                        |
| Unique proteins                    | 949                            | 77                          | 1,748                      | 1,472                           | 731                        | 2,072                      | 1,030                       | 2,313                      |
| % SSRs†                            | 3.3                            | 2.3                         | 2.8                        | 2.9                             | 2.5                        | 2.3                        | 2.4                         | 1.9                        |
| Avg. transcript length             | 1,886                          | 1,705                       | 1,579                      | 1,596                           | 1,575                      | 1,711                      | 1,724                       | 1,744                      |
| % genome transcribed               | 60                             | 52                          | 56                         | 57                              | 54                         | 57                         | 55                          | 61                         |
| Secreted proteins‡                 | 852                            | 861                         | 1457                       | 1413                            | 1378                       | 1346                       | 1144                        | 1009                       |
| GPI anchor proteins                | 16                             | 22                          | 18                         | 21                              | 21                         | 16                         | 18                          | 17                         |
| Secretory proteins<br>(% proteome) | 836<br>(13.1)                  | 839<br>(13.7)               | 1439<br>(14.1)             | 1392<br>(14.1)                  | 1357<br>(13.8)             | 1330<br>(13.9)             | 1126<br>(14.1)              | 992<br>(14.6)              |
| Effector proteins<br>(% proteome)  | 256<br>(4.0)                   | 285<br>(4.66)               | 467<br>(4.6)               | 446<br>(4.5)                    | 429<br>(4.37)              | 419<br>(4.4)               | 331<br>(4.2)                | 343<br>(5.1)               |

148

149 The *S. buchloëana* genome is 5.7% repetitive DNA, with the largest repeat categories being  
150 simple sequence repeats (3.3%) and Long Terminal Repeat (LTR) retrotransposons (1.9%;  
151 Supplementary Table 2). Proteins were predicted using *S. buchloëana* transcriptomic sequences  
152 to guide *ab initio* gene prediction (Cantarel *et al.*, 2008). Genome annotation showed that,  
153 relative to related fungi (Table 1), *S. buchloëana* has the fewest predicted protein coding genes  
154 (6,379), fewest predicted tRNAs (56), fewest unique proteins (949), and fewest number of  
155 predicted secreted proteins and effectors at 836 (13.1% of the proteome) and 256 (4.0% of the  
156 proteome), respectively. However, *S. buchloëana* has the longest average transcript length and a  
157 relatively high percent of the genome transcribed. Interestingly, we find that *S. buchloëana* has  
158 retained genes in the sulfur and nitrogen metabolic pathways that are typically missing in  
159 obligate biotrophic fungi (Sharma *et al.*, 2015; Jiang *et al.*, 2013), indicating that *S. buchloëana*  
160 may survive outside its host in certain environmental conditions (Supplementary Fig. 2).

161

162 Centromeric sequences typically have lower GC content (Diner *et al.*, 2017), lower gene density,  
163 and are enriched with long tandem repeats (Melters *et al.*, 2013). We scanned for these three



164 features across *S. buchloëana* chromosomes to identify putative centromeric regions (Fig. 2;  
165 Supplementary Fig. 3). The size of the 22 predicted centromeric regions ranged from 32 to 181  
166 kb in length. This proposed range of centromere sizes is in agreement with other fungal  
167 centromeres measured using a specialized histone H3 variant, CENP-A (the acid test for  
168 centromeric locations; Smith, 2002). All predicted *S. buchloëana* centromeres were some version  
169 of metacentric or acrocentric with the exception of chromosomes 17 and 22, which were  
170 telocentric.

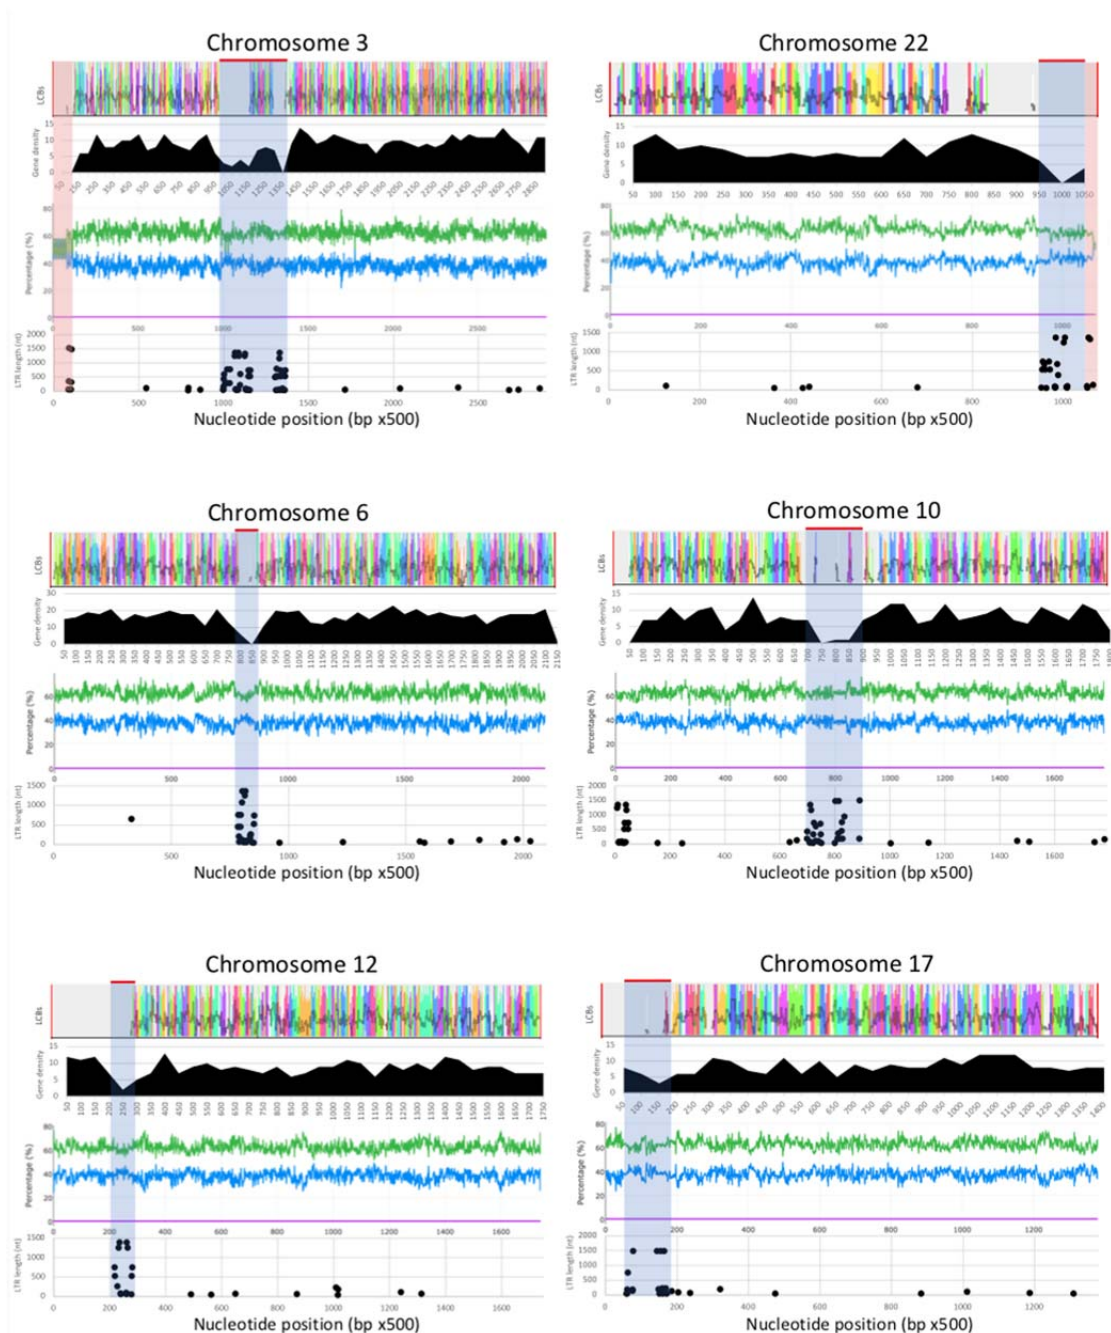

171  
172 **Fig. 2 | Genome features across six of the 22 chromosomes of *Salmacisia buchloëana*. For**  
173 **each chromosome, from top to bottom, graphs show (1) The Local Colinear Blocks (LCBs) of *S.***  
174 ***buchloëana* sequences compared to five *Tilletia* genomes (see methods), where colors represent**  
175 **shared synteny, (2) Gene density across a 25 kb sliding window (black histogram), (3) Percent**  
176 **GC (green) and AT content (blue) per 500 nucleotides (center graph), and (4) LTR**  
177 **retrotransposon location and length (dot plot). Putative centromeric regions are indicated with a**  
178 **gray shaded box, while the shaded red boxes highlight the two ribosomal DNA sequences with**  
179 **reduced GC content.**

180  
181 **Phylogenetic Analysis and Molecular Dating**  
182 *Salmacisia buchloëana* shares similar morphological characteristics with species in the genus  
183 *Tilletia* and was initially placed within *Tilletia* (Kellerman and Swingle, 1889) but later  
184 reclassified and renamed based on host taxonomy, spore ornamentation, and DNA sequence  
185 analysis (Chandra and Huff, 2008). Piątek *et al.*, (2016) conducted a phylogenetic analysis using  
186 28S ribosomal DNA (rDNA) sequences and also found that *S. buchloëana* resides  
187 phylogenetically outside of the *Tilletia*, while Jayawardena *et al.*, (2019) conducted a similar  
188 study and found that *S. buchloëana* placed within the *Tilletia* genus. The discrepancy in  
189 phylogenetic placement may not be surprising since, in all three studies, *S. buchloëana* resides  
190 on a long phylogenetic branch, indicating a high level of molecular divergence from its nearest  
191 ancestors, raising the possibility of incorrect placement due to error associated with ‘long branch  
192 attraction’ (Felsenstein, 1978). Here, we used 328 pairs of single-copy orthologous genes  
193 spanning the Ustilaginomycotina and found that *S. buchloëana* fell within the genus *Tilletia* (Fig.  
194 3).

195



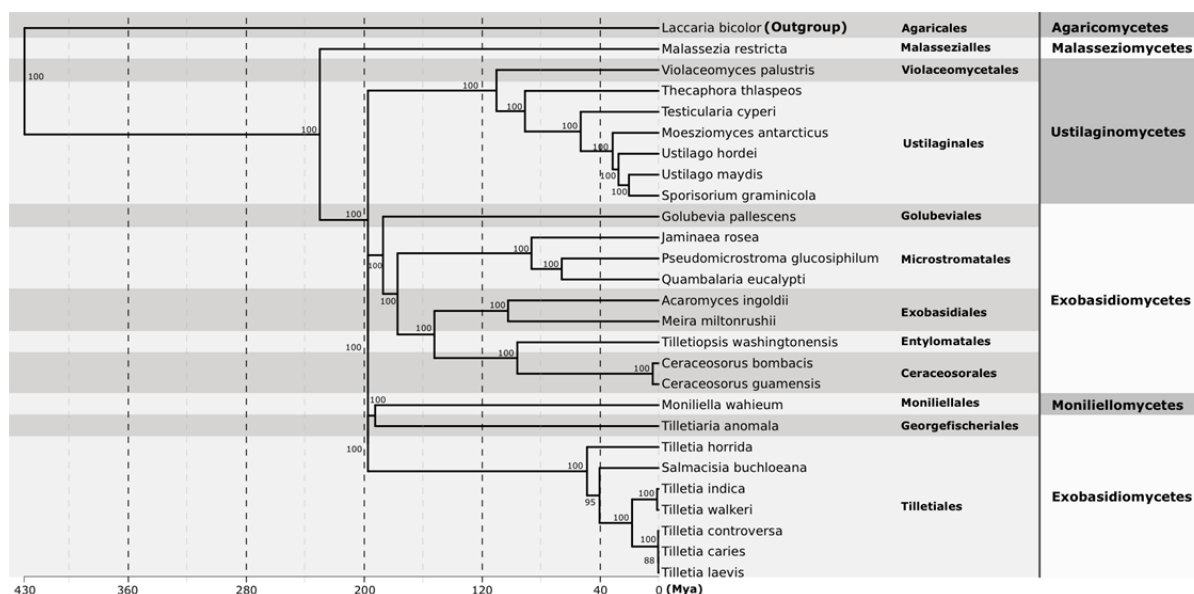

196 **Fig. 3 | A phylogenetic classification of fungal genomes in the Ustilaginomycotina based on**  
 197 **328 single-copy orthologs.** The tree was generated using RAxML with 100 bootstraps.  
 198 Bootstrap probabilities are shown above branches. Branch lengths are scaled to the divergent  
 199 time estimates.

200  
 201 The common ancestor of *S. buchloëana* and outgroup *Laccaria bicolor* is estimated to have  
 202 diverged early in the evolution of the Basidiomycota, ~430 Million years ago (Mya; Zhao *et al.*,  
 203 2017; He *et al.*, 2019). We used the divergence of *S. buchloëana* and *L. bicolor* to calibrate our  
 204 molecular dating and found that *S. buchloëana* diverged from *T. horrida* 48 Mya and diverged  
 205 from the other five species of *Tilletia* (*T. indica*, *T. walkeri*, *T. caries*, *T. controversa*, and *T.*  
 206 *laevis*) 40 million years ago. Our analysis suggests that the *T. caries* and *T. walkeri* clades  
 207 diverged from each other 18 Mya.

208  
 209 **Analysis of high GC content in *Salmacisia buchloëana***

210 GC content can range from 13 to 80% in bacteria but is typically less than 50% for plants,  
 211 animals, and fungi (Li and Du, 2014). Most coding regions have a higher GC content than non-  
 212 coding regions and for this reason, many researchers have investigated the cause and utility of  
 213 GC content variation. Chromosomal regions with high GC content have been termed ‘isochores’  
 214 in animals and are described as giving stability and structure to the genome (Vinogradov, 2003).  
 215 GC content has been implicated in molecular phenomena, including GC-biased gene conversion

216 (Long *et al.*, 2018), reduced DNA denaturation in GC-rich regions (Fryxell *et al.*, 2000), and the  
217 negative relationship between GC content and mutation (Wolfe *et al.*, 1989).

218  
219 Species in the Basidiomycota have the highest GC content among fungi (mean = 54.6%; Storck,  
220 1966). *Salmacisia buchloëana* (GC% = 62.3 whole genome; 63.7 genic sequences) has the  
221 highest GC content compared to any of its closest relatives and was among the highest in the  
222 Basidiomycota; less than *Anthracoystis flocculosa* (65.3%) but higher than *Sporobolomyces*  
223 *salmonicolor* (61.3%) and *Rhodotorula mucilaginosa* (59.9%). The distribution of GC content is  
224 uniformly high along *S. buchloëana*'s 22 chromosomes, with minor exceptions. The large and  
225 small rDNA subunits on chromosomes 3 and 22 represented the regions with the highest AT  
226 contents across the entire 20.1 Mb genome (Fig. 2; Supplementary Fig. 3). We compared the  
227 distribution of GC content of other fungi in the Basidiomycota and found that reduced GC  
228 content is maintained in the rDNA sequence of each of the species that we analyzed  
229 (Supplementary Fig. 4), suggesting that rDNA is resistant to variation in GC content in the  
230 Basidiomycota and may be under purifying selection to maintain this pattern of oscillating GC  
231 content at about a 50% level. We do not detect a strong signal of repeat-induced point mutations  
232 (RIP) in the *S. buchloëana* genome (0.03%), a result that was expected since RIP regions  
233 typically have higher AT content (Selker and Stevens, 1985; Hane and Oliver, 2008).

234

### 235 **GC Content and Codon Usage**

236 We analyzed an orthologous gene set from five of the six *Tilletia* species that included at least  
237 948 of 985 orthologous genes depending on the species (Note: the *T. laevis* genome was not  
238 publicly available at the time these analyses were performed). Using this orthologous gene set,  
239 we performed a neutrality test to compare the GC content of the 1<sup>st</sup> and 2<sup>nd</sup> codon positions  
240 (GC12) against that of the 3<sup>rd</sup> position (GC3; *i.e.*, the synonymous codon position; Fig. 4). We  
241 found that *S. buchloëana* had the highest GC content for coding, genome, or non-coding  
242 sequences (Fig. 4A) and the highest relative selective constraints on its GC content (Fig. 4B)  
243 compared to any of the other five *Tilletia* species. While the level of selective constraints seemed  
244 to be correlated with overall GC content, there was an exception with *T. horrida* in that it  
245 showed a relatively low GC content but a relatively high selective constraint value (Fig. 4A vs

246 B). Given the assumption that mutation rates are in equilibrium, one possible explanation is that  
 247 selective constraints are keeping the GC content of *T. horrida* lower than its close relatives.

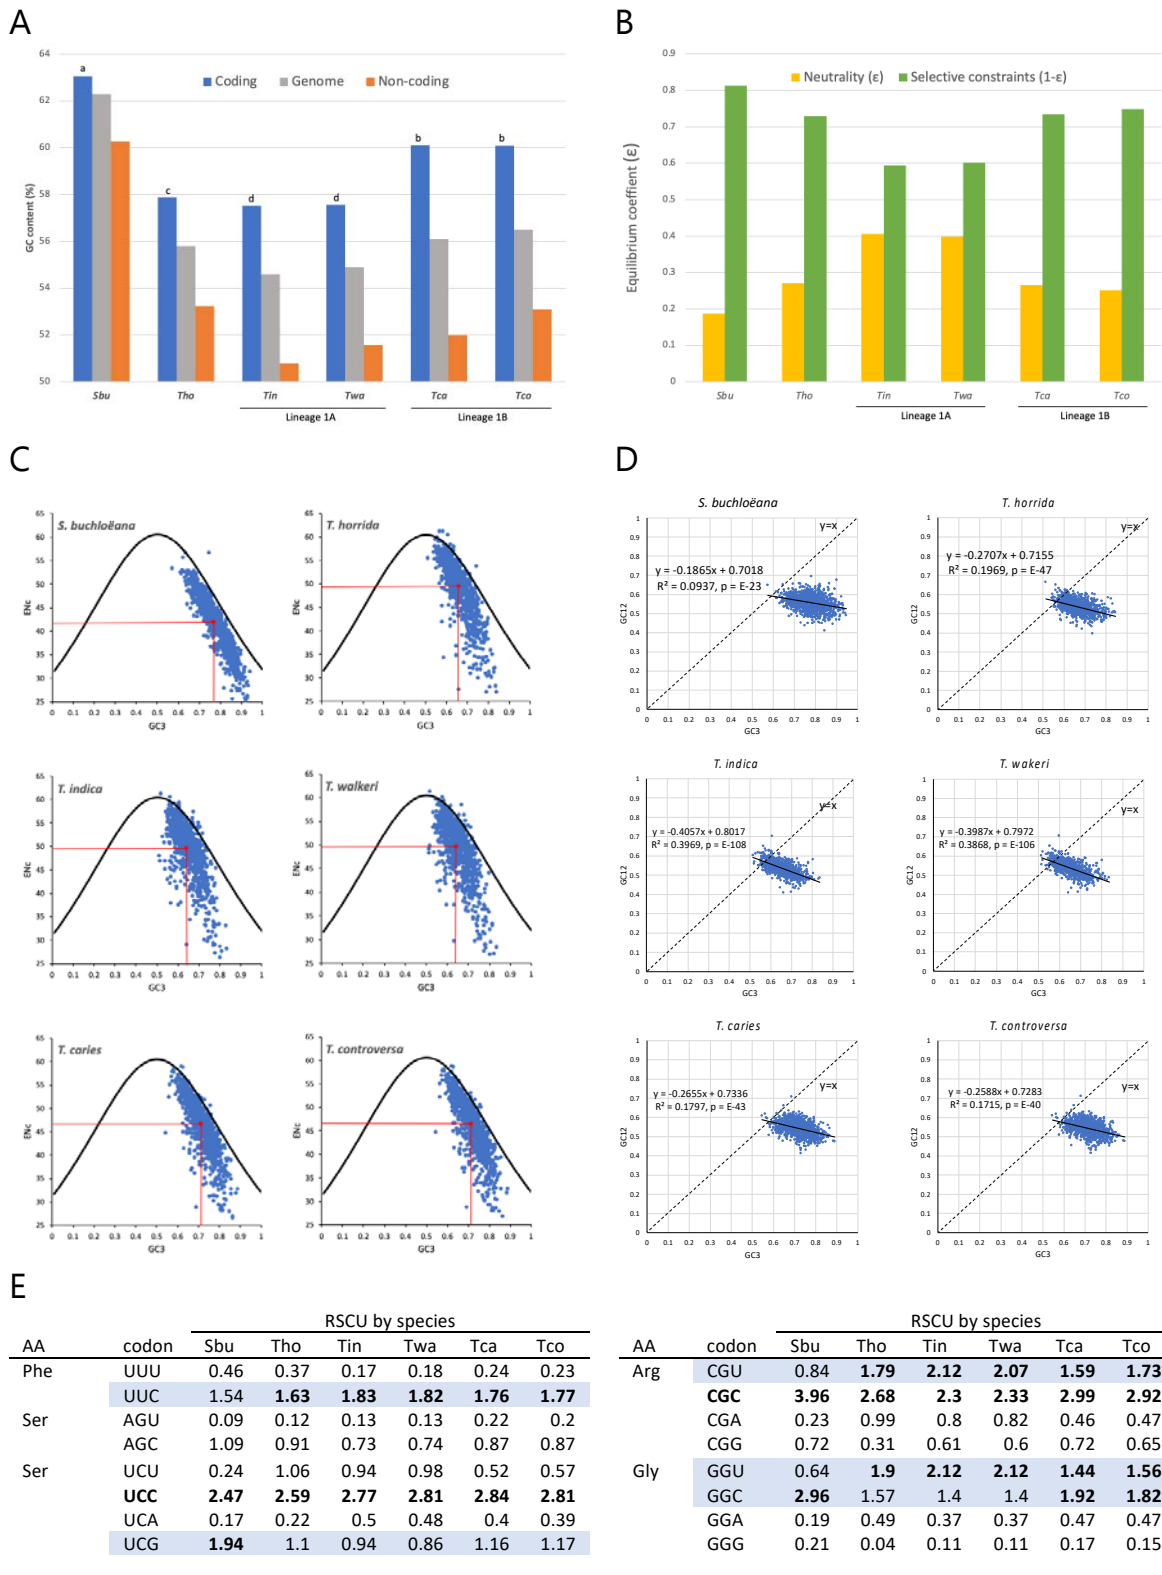

248

249 **Fig. 4 | GC content and codon usage in *Salmacisia buchloëana*.** (A) Percent GC content in *S.*  
250 *buchloëana* and other species in the genus *Tilletia*. GC content (%) of coding (orthologous gene  
251 set), non-coding and genomic sequence. Coding means topped by different letters are  
252 significantly different at the  $p=0.0001$  level of significance. (B) Neutrality vs selection of codon  
253 GC12 content. Evolutionary modeling of GC content at the 1<sup>st</sup> and 2<sup>nd</sup> codon position (GC12) of  
254 the orthologous gene set. The absolute value of the mutation-selection equilibrium coefficient  $\epsilon$   
255 (approximated by the slope of the neutrality plots) equals the relative effects of neutrality while  $1$   
256  $-\epsilon$  equals the relative effect of selection constraints governing GC12 content. (C) Effective  
257 number of codons (ENc) vs GC content at the 3<sup>rd</sup> codon position (GC3) of the orthologous gene  
258 set coding sequences (blue dots). Black line represents the theoretical limit of ENc, red lines  
259 indicate mean values of ENc and GC3. (D) Neutrality plots (GC12 vs GC3) of the orthologous  
260 gene set coding sequences (blue dots). Linear regression (solid black line) equation and  
261 coefficient of determination ( $R^2$ ) indicated. Theoretically complete equilibrium with directional  
262 mutation ( $y=x$ ) is represented by dashed line. (E) Relative synonymous codon usage (RSCU) for  
263 the orthologous gene set from *Salmacisia buchloëana* and the five *Tilletia* species. RSCU values  
264 in bold are significantly ( $p<0.01$ ) biased as determined by a two-way Chi-square contingency test  
265 in CodonW. Codons in bold are significantly biased across all species. Highlighted codons  
266 denote differences among species (see Supplementary Table 3 for the full RSCU table).

267  
268 The effective number of codons (ENc; Fig. 4C) and the neutrality plots (GC12 vs GC3; Fig. 4D)  
269 suggest that *S. buchloëana* has less codon bias than the other *Tilletias* (Fig. 4C). The five *Tilletia*  
270 species appeared to have more genes that were further in distance from the ENc equilibrium line  
271 (Fig. 4C) and had higher mean ENc and steeper regression slopes (Fig. 4D) than *S. buchloëana*,  
272 suggesting that they have more codon bias. Similarly, analysis of the relative synonymous codon  
273 usage (RSCU) found more codon bias for the five *Tilletia* species than for *S. buchloëana*. Out of  
274 a total of 21 biased codons, 20 were biased in *T. caries* and *T. controversa*, 19 were biased in *T.*  
275 *horrida*, *T. indica*, and *T. walkeri*, and 18 codons were biased in *S. buchloëana* (Supplementary  
276 Table 3). Sixteen (76%) of the 21 total codon biases observed were shared across all six species.  
277 The five instances of biased discrepancy among species all involve *S. buchloëana* (Fig. 4E). In  
278 three of the five instances, *S. buchloëana* lacked a significant codon bias that all other *Tilletia*  
279 species shared (UUC, Phe; CGU, Arg; GGU, Gly). In one instance, *S. buchloëana* shared a bias

280 (GGC, Gly) with the other two systemically infecting fungi, *T. caries* and *T. controversa*. The  
281 fifth and final codon bias was only present in *S. buchloëana*, *i.e.*, the UCG codon for serine.

282

### 283 **CAZymes and MEROPS**

284 Carbohydrate-Activated enZymes (CAZymes) are involved with the synthesis and degradation of  
285 polysaccharides and glycoconjugates (Park *et al.*, 2010). Biotrophic fungi such as *S. buchloëana*  
286 and the *Tilletias* rely on their hosts for survival and completion of their fungal lifecycle, and  
287 therefore typically have fewer CAZymes than hemibiotrophic, saprotrophic, and necrotrophic  
288 fungi. Among the fungal biotrophs in this study, *S. buchloëana* had an intermediate number of  
289 CAZymes at 313 with modest depletions in all enzyme classes except the largest class, glycoside  
290 hydrolases (GHs; Supplementary Fig. 5A and B). The CAZyme profile of *S. buchloëana* is  
291 similar to the *Tilletias*, likely due to their shared evolution and biotrophic relationship to their  
292 hosts.

293

294 Fungal peptidases (proteases) are necessary for digestion of protein substrates and are often  
295 secreted into the environment for the breakdown of external protein targets. Secreted peptidases  
296 are essential for pathogenicity and considered virulent to the plant host. Classification of  
297 peptidases and their inhibitors are available at the MEROPS database (Rawlings *et al.*, 2018).  
298 The distribution of peptidase families in *S. buchloëana* is similar to the *Tilletias*, with only a  
299 couple noteworthy exceptions, one being the presence of inteins (N09s). Genomes are known to  
300 contain selfish genetic elements that promote their own replication at the expense of the host,  
301 including transposable elements, self-promoting plasmids, and B chromosomes (Werren, 2011).  
302 Inteins (*intervening proteins*) are a special class of selfish genetic elements and similar in  
303 concept to the introns of DNA (Shah and Muira, 2014). Inteins range in size from 134 to 1,065  
304 amino acids and are mostly found in bacteria and archaea (Green *et al.*, 2018). Currently, there  
305 are 257 known inteins that have been identified in 231 species of eukaryotes, with 15 inteins  
306 being found in the Basidiomycota, primarily in the human pathogen *Cryptococcus* spp. and the  
307 bunt genus *Tilletia* (Green *et al.*, 2018). Thus, it is uncommon for eukaryotic species to possess  
308 an intein and rare to contain more than one intein.

309



310 A total of three genes within the genome of *S. buchloëana* were found to contain inteins, namely  
311 in the pre-mRNA-splicing process factor 8 (Prp8; MOEQ 005882) gene on chromosome 8, the  
312 DNA-dependent RNA polymerase 2 (RPB2; MOEQ 004009) gene on chromosome 3, and the  
313 DNA-dependent RNA polymerase 2-like (RPB2-like; MOEQ 002009) gene on chromosome 15.  
314 The amino acid sequences of these three inteins will be referred to as SbuPrp8i, SbuRPB2i, and  
315 SbuRPB2-likei, respectively. Inteins are transmitted to their hosts both vertically and  
316 horizontally (Green *et al.*, 2018). Thus, phylogenetic trees do not necessarily represent an accurate  
317 portrait of the relatedness among inteins across different fungal species. However, the maximum  
318 likelihood phylogenetic trees representing the SbuPrp8i intein or SbuRPB2i and SbuRPB2-likei  
319 inteins in fungi did cluster according to phyla (Fig. 5A and B). Like all inteins, the SbuPrp8i,  
320 SbuRPB2i, and SbuRPB2-likei begin with a cystine residue (C-1) and end with an asparagine  
321 residue (N-284, N-397, and N-423, respectively) (Fig. 5C and E). SbuPrp8i also contains a  
322 LAGLIDADG-type homing endonuclease domain as well as an N-splicing domain (Blocks  
323 A&B) and a C-splicing domain (Blocks F&G) (Fig. 5C). According to Duan *et al.* (1997), blocks  
324 C and E are the original LAGLIDADG motifs and each contains an endonuclease active site Asp  
325 (D) or Glu (E) while block D contains a putative active site Lys (K). However, as a result of  
326 mutations, several inteins from other species examined were found to contain only partial motifs.  
327 The Prp8 inteins of *Cryptococcus gatti* and *C. neoformans* completely lack a LAGLIDADG-type  
328 homing endonuclease and, as such, are referred to as ‘mini-inteins’. Interestingly, the two inteins,  
329 RPB2i and RPB2-likei, identified here (Fig. 5E) reside between two frequently used reverse  
330 primers (bRPB2-7R and bRPB2-7.1R) for the amplification of the fungal RPB2 gene which is  
331 commonly used for phylogenetic analysis of fungi (Sun *et al.*, 2009). Thus, the presence of either  
332 RPB2i or RPB2-likei has the potential to alter RPB2 amplicon sequence information and hence  
333 alter the phylogenetic placement of species containing these specific inteins. Reverse primer  
334 bRPB2-7R is located in the RPB2 N-extein typically six residues from RPB2 intein block A,  
335 while reverse primer bRPB2-7.1R is located typically one residue from RPB2 intein block G in  
336 the RPB2 C-extein. Fungal taxonomists should make note of this finding for their future use of  
337 the RPB2 gene in phylogenetic analyses.

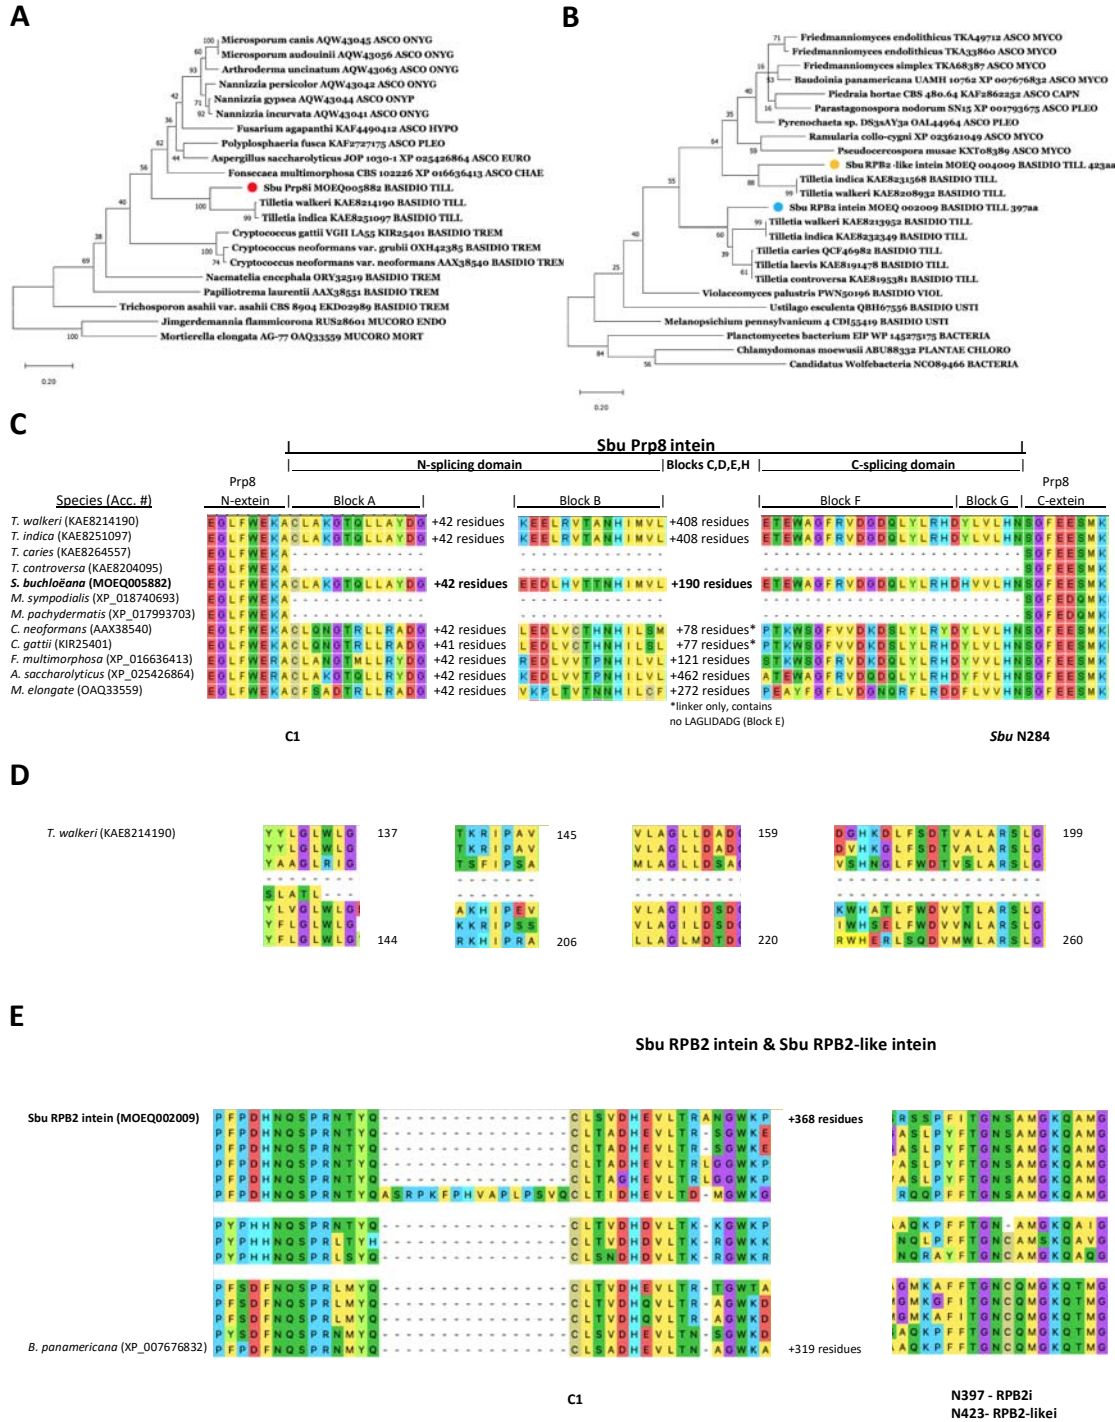

338

339 **Fig. 5 | Inteins of *Salmacisia buchloëana* include Prp8i, RPB2i and RPB2-likei. (A)**

340 Phylogenetic tree of the *S. buchloëana* Prp8 intein (red dot) with selected inteins from other

341 fungi (highest log likelihood tree, -2991.50; 550 bootstraps with bs >50 indicated; phylum and

342 order of each fungal host is abbreviated; Abbreviations: ASCO, Ascomycota [CHAE,

343 Chaetothyriales; EURO, Eurotiales; HYPO, Hypocreales; ONYG, Onygenales; PLEO,

344 Pleosporales]; BASIDIO, Basidiomycota [TILL, Tilletiales; TREM, Tremellales; USTI,  
345 Ustilaginales]; MUCORO, Mucoromycota [ENDO, Endogonales; MORT, Mortierellales]). (B)  
346 Phylogenetic tree of the *Salmacisia* RPB2 intein (blue dot) and RPB2-like intein (brown dot)  
347 with selected inteins from fungi and bacteria (highest log likelihood tree, -1407.72; 550  
348 bootstraps with bs >50 indicated; phylum and order of each host species is abbreviated;  
349 Abbreviations: ASCO, Ascomycota [CAPN, Capnodiales; MYCO, Mycocaliciales; PLEO,  
350 Pleosporales]; BASIDIO, Basidiomycota [TILL, Tilletiales; USTI, Ustilaginales]; PLANTAE  
351 CHLORO, Chlorodendrales). (C) Fungal species containing the Prp8 intein share certain  
352 domains including the N-splicing domain (Blocks A&B), the C-splicing domain (Blocks F&G)  
353 and variable amounts of linker between blocks B and F that may contain a LAGLIDADG-type  
354 homing endonuclease. The genomes of *Tilletia caries*, *T. controversa*, *Malassezia sympodialis*  
355 and *M. pachydermatis*, do not contain the Prp8 intein for comparison. (D) The DOD  
356 (LAGLIDADG) homing endonuclease helix motifs (Blocks C, D, E, H) of Prp8 inteins from  
357 selected fungal species. (E) RPB2 and RPB2-like inteins and exteins along with positions for  
358 two of the most frequently used reverse primers (bRPB2-7R and bRPB2-7.1R) for the  
359 amplification of the fungal RPB2 gene in phylogenetic studies. Reverse primer bRPB2-7R is in  
360 the RPB2 N-extein typically six residuals from RPB2 intein Block A, while reverse primer  
361 bRPB2-7.1R is located typically 1 residual from RPB2 intein Block G in the RPB2 C-extein.

362  
363 Our analysis of peptidases also revealed that *S. buchloëana* has one of the largest fractions of  
364 serine peptidases in all classified fungi to date (1.53% of the proteome), falling just behind the  
365 highest recorded fungus, ascomycete *Torrubiella hemipterigena* at 1.56% (Muszewska *et al.*,  
366 2017). *Salmacisia buchloëana*'s enrichment in serine peptidases is primarily due to an  
367 abundance of genes in the subtilisin family (Supplementary Fig. 5C and D). Subtilisins (S08s)  
368 are involved with cellular degradation and hormone activation and are often secreted proteins  
369 found to be enriched in fungi with a pathogenic lifestyle (Muszewska *et al.*, 2017; Leger *et al.*,  
370 1997). Interestingly, *S. buchloëana* has a noticeably higher number of predicted subtilisins than  
371 any of the closely related species that we examined (*S. buchloëana* = 23, *Tilletia* sp. ≤ 14). Many  
372 of *S. buchloëana*'s subtilisins are products of gene duplication and are unique to the species (Fig.  
373 6E). The abundance of subtilisins in the *S. buchloëana* genome suggests that they may have  
374 played a functional role in its host specificity.

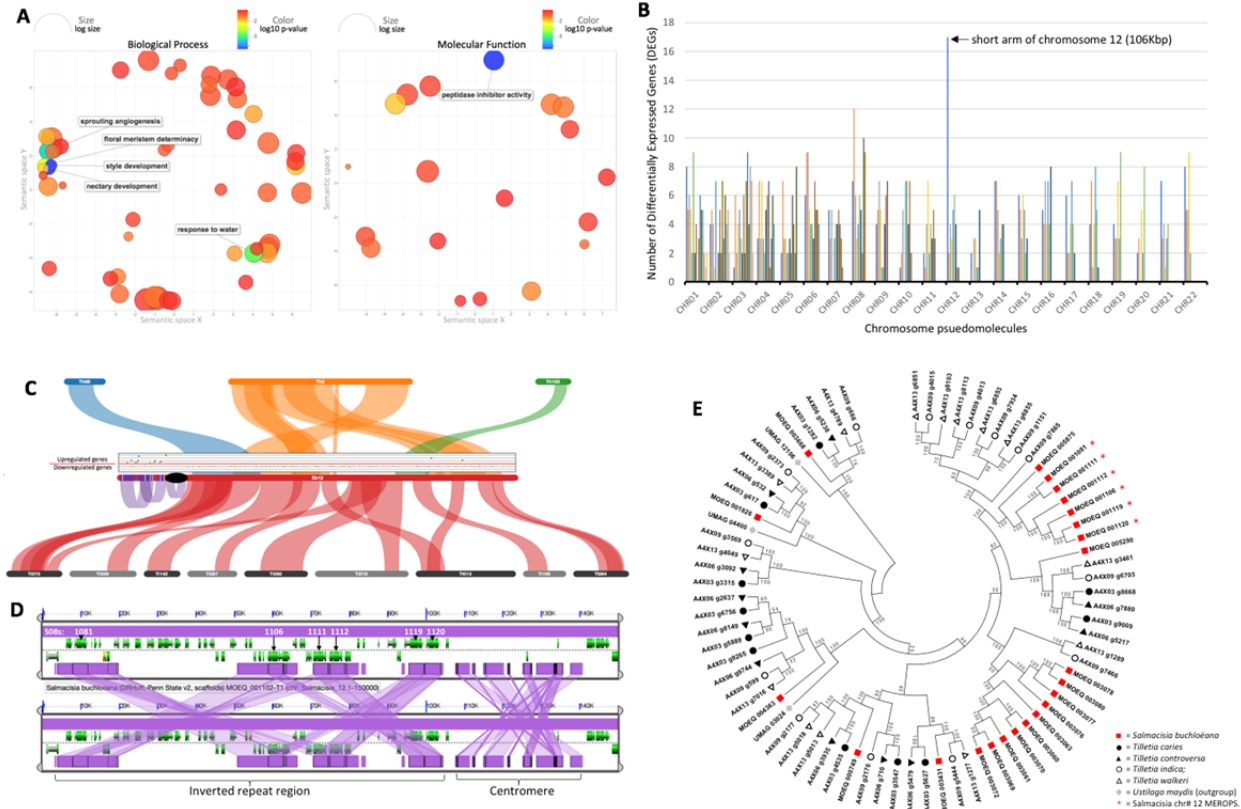

375  
 376 **Fig. 6 | Features of host manipulation and the unique short arm of chromosome 12. (A)**  
 377 Analysis of gene ontologies (GOs) shows functionally enriched categories of male buffalograss  
 378 when infected with the sex-altering fungus, *Salmacisia buchloëana*. Enriched GOs are clustered  
 379 if their function is semantically similar. Only enrichments with a log<sub>10</sub> p-value ≤ -2.5 are shown.  
 380 On the left, GOs associated with biological process and on the right, GOs with a molecular  
 381 function. Color of the bubbles indicates the p-value associated with the term, and size indicates  
 382 the frequency of the GO term in the Gene Ontology Annotation (GOA) database (General GO  
 383 terms have larger bubbles). (B) The distribution of up-regulated genes across the chromosomes  
 384 of *S. buchloëana* (log<sub>2</sub> fold change ≥ 1.5; false discovery rate ≤ 0.05) when the fungus is grown in  
 385 its host rather than in culture (see methods). Chromosome distributions used a sliding, non-  
 386 overlapping 100 kb window. (C) Gene expression (scatter plot) and syntenic comparisons  
 387 (colored ribbons) across chromosome 12 highlights sequence and functional novelty in *S.*  
 388 *buchloëana*. *Tilletia horrida* scaffolds (Th68, Th2, and Th100) with synteny to chromosome 12  
 389 (top) and *T. indica* (Ti018-Ti142) scaffolds with synteny to *S. buchloëana* (bottom) illustrate that  
 390 the short arm of chromosome 12 is unique to *S. buchloëana*. Purple ribbons on *S. buchloëana*  
 391 chromosome 12 show self-syntenic duplicated regions present as inverted repetitive sequence



392 and the black ellipse is the putative centromeric sequence. White bands mark the location of  
393 subtilisin genes (S08). The scatterplot above *S. buchloëana* chromosome 12 depicts gene  
394 expression along the chromosome during buffalograss infection ( $\log_2$  fold change  $>1.5$ ; false  
395 discovery rate  $\leq 0.05$ ). Above the red line are genes that are upregulated during infection and  
396 below the line are genes downregulated during infection. (D) Expanded view of the duplicated  
397 and inverted repeats of S08s on the short arm of chromosome 12. (E) Evolutionary relationships  
398 of S08s among Tilletiales. Red squares = *S. buchloëana*; black circles = *T. caries*; black triangles  
399 = *T. controversa*; open circles = *T. indica*; open triangles = *T. walkeri*; grey diamonds = *Ustilago*  
400 *maydis*. Red asterisks are located on chromosome 12 and are unique to *S. buchloëana*.

401

#### 402 **Sex alteration of the host**

403 The ability for fungi to manipulate the sex of their hosts is rare among biotrophs but not entirely  
404 unique to *S. buchloëana*. The best described example is anther-smut (*Microbotryum* spp.), a  
405 genus of fungi that infects plants in the Caryophyllaceae family and replaces pollen with fungal  
406 spores in developing flowers (Hood *et al.*, 2010; Kemler *et al.*, 2020). In dioecious  
407 Caryophyllaceae (ex. *Silene latifolia* and *S. dioica*), infection with *Microbotryum* spp. causes  
408 anthers to develop in genetically female plants (Uchida *et al.*, 2003). Genomic and  
409 transcriptomic surveys have helped identify cell-wall degrading enzymes, secondary lipases,  
410 glycosyltransferases, and other enzymes that might play a role in *Microbotryum*'s biotrophic  
411 lifestyle and its ability to manipulate its hosts sex expression (Perlin *et al.*, 2015).

412

413 To survey the *S. buchloëana* genome for factors involved with host sex manipulation, we  
414 compared the colinear syntenic relationship between *S. buchloëana* and the genomic scaffolds of  
415 related *Tilletias*. Our goal was to scan for unique (non-syntenic) segments of the *S. buchloëana*  
416 genome that may have been essential to its evolution after it diverged from the *Tilletias*. The  
417 largest segment of the *S. buchloëana* genome that lacked syntenic relationship was the 106 kb  
418 short arm of acrocentric chromosome 12 that contained 44 genes, of which, 59% (26 genes) were  
419 predicted to be secreted, and six were subtilisins (Fig. 6C and E).

420

421 Chandra and Huff (2010), found that buffalograss florets show the first signs of unisexual floral  
422 development during the boot stage of inflorescences development. We compared the gene



423 expression profiles of *S. buchloëana* grown in culture (potato dextrose agar) to *S. buchloëana*  
424 growing in the developing inflorescences of male buffalograss to identify fungal genes that  
425 might play a role in reactivating the nonfunctional pistillate rudiments of male plants. We  
426 identified 3,017 differentially expressed *S. buchloëana* genes (DEGs). Most (91%) of DEGs  
427 were downregulated *in planta* and lacked functional annotation (Supplementary Fig. 6). We  
428 mapped DEGs to the reference genome and observed that the unique short arm of chromosome  
429 12 also contained the highest density of upregulated genes across the entire *S. buchloëana*  
430 genome (Fig. 6B and C). Of the 44 gene annotations in the short arm, 39% (17 genes) were  
431 significantly upregulated in the developing inflorescences of male plants. Although the short arm  
432 contains no syntenic relationship to the other *Tilletias*, it does have a collinear relationship with  
433 tandemly duplicated blocks across the arm (Fig. 6C and D), suggesting that sequence duplication  
434 contributed to the expansion of the short arm and may have had a major impact on the fungus'  
435 evolution and speciation from the *Tilletia*.

436  
437 We also analyzed the functional enrichments of buffalograss genes during inflorescences  
438 development and found that male plants infected with *S. buchloëana* upregulated genes involved  
439 in pistil-associated gene classes, such as nectar development, style development, and floral  
440 meristem determinacy (Fig. 6A). In addition to pistil-associated gene classes, infected  
441 buffalograss was also enriched for peptidase inhibitor activity, suggesting that *S. buchloëana*  
442 secreted peptidases (ex. serine peptidases) may have triggered some level of defense response in  
443 the host. Our analysis suggests that the short arm of chromosome 12 plays an important role in *S.*  
444 *buchloëana*'s host specificity and may have coevolved with buffalograss.

## 445 446 **Discussion**

447 The multidimensional and extended phenotypes of biotrophic fungi and their plant hosts are  
448 complex example of parasitic manipulation of morphology. We present the chromosome-level  
449 genome assembly of *S. buchloëana*, a fungal parasite that coerces its host to develop pistils in  
450 plants that are genetically programmed not to produce such organs in order to accommodate the  
451 fungal parasite's own reproductive biology. Our analysis suggests that *S. buchloëana* is basal to  
452 the *T. caries* and *T. walkeri* clades of fungi, having diverged ~40 million years ago. We find that  
453 *S. buchloëana*'s ecological novelty is likely facilitated by molecular functions encoded on the

454 short arm of its chromosome 12, a region that is unique to *S. buchloëana*, enriched for secreted  
455 proteins and subtilisins, and has an abundance of genes that are upregulated during host floral  
456 development (Fig. 6). While some genes on the short arm of chromosome 12 may be involved  
457 with host sex manipulation or other multidimensional phenotypes, we expect that other genes are  
458 involved with biological processes that are essential for biotrophy (host penetration, defense, and  
459 evasion) in buffalograss. In addition, we identify three duplicated blocks of genes on the short  
460 arm of chromosome 12, suggesting that tandem gene duplications likely played a role in the  
461 expansion of chromosome 12 and the elevated number of subtilisins in the species. Interestingly,  
462 upon infection with *S. buchloëana*, male buffalograss upregulates genes involved in pistil  
463 development as well as peptidase inhibitors. We hypothesize that buffalograss' upregulated pistil  
464 development genes are a *result* of manipulation, while upregulated peptidase inhibitors might be  
465 buffalograss' defense *response* to being manipulated. Finally, we identify and characterize  
466 genetic components of the *S. buchloëana* genome, including the presence of rare inteins, biases  
467 in codon usage, and an elevated GC content. The genomic insights generated as a result of this  
468 work have led to a clearer picture of the molecular underpinnings of *S. buchloëana*'s ability to  
469 manipulate the reproductive anatomy in its plant host. This work has generated valuable genomic  
470 resources and discoveries that advances our understanding of coevolutionary dynamics and the  
471 molecular basis for disease susceptibility in cereal crops.

472

## 473 **Materials and Methods**

### 474 **DNA extraction and Genome Sequencing**

475 Fungal DNA was isolated from tissue grown in culture on potato dextrose agar (PDA; Alpha  
476 Biosciences Inc., Baltimore, MD) using the Fungi/Yeast Genomic DNA Isolation Kit (Norgen  
477 Biotek Corp., Ontario, Canada). High molecular weight DNA was prepared for sequencing using  
478 the SMRTbell Template Preparation kit (v.1.0), and long-read DNA sequencing was conducted  
479 using the PacBio Sequel System based on Single Molecule, Real-Time (SMRT) Sequencing  
480 technologies. The resulting BAM file was converted to FASTQ format and input into the Canu  
481 (v.1.8; Koren *et al.*, 2017) *de novo* genome assembler for generation of consensus sequence and  
482 construction of pseudomolecules. The mitochondrial genome was clipped at overlapping circular  
483 ends and annotated with GeSeq (Tillich *et al.*, 2017) and visualized using OGDRAW (v.1.3;  
484 Greiner *et al.*, 2019) with default parameters.

485

## 486 **Protein Prediction and Annotation**

487 Repetitive elements were classified using RepeatMasker (v.4.1.2) via the MAKER pipeline  
488 (Cantarel, 2008) and softmasked prior to gene annotation. Protein prediction, annotation, and  
489 genome comparisons were performed according to the Funannotate (v.1.5.1) pipeline that  
490 classifies *ab initio* gene predictions into consensus gene predictions and functionally annotates  
491 proteins. Briefly, STAR (v.2.7; Dobin *et al.*, 2013) was used to align transcript evidence from the  
492 RNA-seq (see below) to the genome. Of the 18,773 initial transcript predictions, STAR aligned  
493 7,749 to the genome. Diamond (v.0.9.22; Buchfink *et al.*, 2015) and exonerate (v.2.2) were used  
494 to align UniProt's 546,247 manually annotated and reviewed proteins (Swiss-Prot) to the *S.*  
495 *buchloëana* genome. Between the two tools, 1,029 preliminary alignments were identified and  
496 used for gene prediction. Transcript and protein evidence were given to the two gene predictors,  
497 GeneMark-ES (v.4.21; Brůna *et al.*, 2020) and Augustus (v.3.2.1; Stanke *et al.*, 2006). The  
498 resulting 12,774 gene models were passed into EvidenceModeler (v.0.1.3; Haas *et al.*, 2008) and  
499 reduced to 6,555 high quality gene models. High quality models were filtered for lengths of less  
500 than 50 amino acid and the presence of transposable elements to reduce the set to 6,427 gene  
501 models. tRNAscan-SE (v.1.3.1; Lowe and Eddy, 1997) was used to identify 48 predicted tRNAs,  
502 reducing our final set of predicted genes to 6,379.

503

## 504 **Comparative Genomics**

505 Fungal genomes from the Ustilaginomycotina were downloaded from NCBI and annotated in-  
506 house using the funannotate pipeline as described above to assure that downstream comparative  
507 analyses would not be biased by the annotation pipeline or other methodological restriction (See  
508 Supplementary Table 4 for the list of fungal species and isolates used). The closest fungal genus  
509 to *S. buchloëana* is the *Tilletia*. Some of the most well characterized *Tilletias* have caused  
510 economic constraints and yield loss in their cereal crop hosts (Murray and Brennan, 1998; Qin *et*  
511 *al.*, 2021), and six of those species have publicly available reference genomes on NCBI  
512 (Castlebury, Carris, and Vanky 2005; Carris, Castebury, and Goates 2006). Briefly, *T. indica*, *T.*  
513 *caries*, *T. laevis*, and *T. controversa* infect wheat and have resulted in lost revenue mainly  
514 through quarantines and bans on grain imports (Nagarajan *et al.*, 1997). *Tilletia walkeri* infects  
515 ryegrass species, *Lolium multiflorum* and *L. perenne* under natural conditions, and *T. horrida*

516 causes major disease in rice and limits the use of hybrid seed production (Wang *et al.*, 2018). For  
517 the functional annotation and comparative genomics of the *Tilletias*, *S. buchloëana*, and other  
518 Ustilaginomycotina, we queried the amino acid sequence for each set of gene annotations against  
519 the PFAM database (v.34; Bateman *et al.*, 2004) to classify protein family evidence, MEROPS  
520 (v.12.3; Rawlings *et al.*, 2009) for peptidases and the proteins that inhibit peptidases, the  
521 CAZyme database for families of structurally similar carbohydrate binding modules and the  
522 catalytic enzymes that alter glycosidic bonds, SignalP (v.5.0; Armenteros *et al.*, 2019) to predict  
523 signaling peptides in each amino acid sequence, the COG database (v.2020; Tatusov *et al.*, 2003)  
524 for clusters of orthologous genes, and antiSMASH (v.5.0; Blin *et al.*, 2019) databases for  
525 functional classification of proteins. Syntenic antiSMASH clusters were visualized using the  
526 Comparative Genomics platform (CoGe; Haug-Baltzell *et al.*, 2017) with the GEvo function and  
527 the LastZ algorithm for sequence alignment (Supplementary Fig. 7). Orthologous clusters  
528 between all fungal annotations were inferred using ProteinOrtho (v.6.0.16; Lechner *et al.*, 2011)  
529 with parameters ‘-syteny -singles -selfblast’ to identify 328 single copy BUSCO (Simão *et al.*,  
530 2015) orthologous clusters. Subsequently, MAFFT (v.6.1; Katoh *et al.*, 2013) was used to align  
531 orthologs, trimAl (v.1; Capella-Gutiérrez *et al.*, 2009) to trim spurious alignments, and RAxML  
532 (v.8; Stamatakis *et al.*, 2014) for phylogenetic analysis of the aligned and trimmed orthologous  
533 genes using 100 bootstraps under maximum likelihood with the flags ‘-f a -m  
534 PROTGAMMAAUTO -p 12345 -x 12345 -# 100 -n nwk’ with *Laccaria bicolor* as the specified  
535 outgroup. The resulting newick-formatted alignment file was used as input into PATHd8 (Britton  
536 *et al.*, 2007) with a fixed age of the *L. bicolor* branch set to 430 Mya. PATHd8 is a rate-  
537 smoothing method that calculates substitution rates locally to scale branch lengths proportionally  
538 to the number of proposed substitutions. Intein and subtilisins were identified using annotation  
539 classes from MEROPS (Supplementary Fig. 5), aligned with MUSCLE (Edger, 2004), and  
540 phylogenetic trees were inferred by using the Maximum Likelihood method and JTT matrix-  
541 based model (Jones *et al.*, 1992) in MEGAX (Kumar *et al.*, 2018). Secreted proteins and effector  
542 proteins were predicted using a custom pipeline that identifies classically and non-classically  
543 secreted proteins as well as putative effector proteins. MCScanX (Wang *et al.*, 2012) was used to  
544 detect colinear syntenic blocks between related *Tilletia* species and *S. buchloëana*. The collinear  
545 MCScanX file was input into SynVisio (Bandi, 2020) to visualize regions of shared homology  
546 and plot gene expression along chromosomes. The analysis of codon usage using the relative

547 synonymous codon usage (RSCU) and the effective number of codons (ENc) were calculated on  
548 an orthologous *Tilletia* gene set (that included at least 948 of 985 orthologous genes depending  
549 on the species) using CAIcal (Puigbò *et al.*, 2008) to calculate the codon adapter index and  
550 measure the synonymous codon usage bias for orthologous pairs of genes. The predicted  
551 theoretical ENc was calculated using GC3 values and the formula,  $2+GC3+29/((GC3*GC3)+((1-  
552 GC3)*(1-GC3)))$ . We also used CodonW for multivariate comparisons of codon and amino acid  
553 usage with default parameters. Repeat-induced point mutations in the *S. buchloëana* genome  
554 were identified using RIPper (van Wyk *et al.*, 2019).

555

### 556 **Centromere Annotation**

557 Mauve (Darling *et al.*, 2004) was used to compare sequence identity to genomic scaffolds of  
558 *Tilletia* species using a multiple genome alignment. Gene density and GC content were plotted  
559 along a 25 kb and 500 bp sliding window, respectively. Only ten of the 22 *S. buchloëana*  
560 chromosomes showed a marked and sustained decrease in GC content, generally approaching a  
561 level of 54% GC content somewhere along the chromosome, indicating a potential location for a  
562 centromeric region. Chromosomes with a visible drop in GC content (ex. chromosomes 2, 9, 11,  
563 and 15) also displayed the lowest overall gene density within the same stretch of chromosome as  
564 well as distinct clusters in terms of length and number of LTRs (Fig. 2; Supplementary Fig. 3).  
565 With four exceptions, we found that the length of LTRs gave the best definition of the  
566 centromeric boundaries such that the first LTR greater than 388 bp in length (*i.e.*, the shortest  
567 LTR in the candidate centromeric region) from either end of the chromosome marked the  
568 centromeric beginning/end. In addition, several of the chromosomes showed two adjacent  
569 clusters of LTRs greater than 500 bp within the centromeric region along with an associated  
570 decrease of gene density (ex. chromosomes 3, 6, and 10) indicating a possible cluster of LTRs on  
571 either side of the actual centromere. Taken together, the convergence of low GC content, low  
572 gene density, and the high frequency of LTRs (primarily Copia and Gypsy; Supplementary Table  
573 2) greater than 388 bp were used to predict the locations of *S. buchloëana*'s centromeric regions  
574 (Fig. 2; Supplementary Fig. 3). Among the four exceptions to this centromeric boundary 'rule',  
575 two involved rDNA located in the telocentric regions of chromosomes 3 and 22 that contained  
576 several LTRs greater than 388 bp, one involved only a single LTR on chromosome 6 which was



577 of the Bel/Pao family, and one involved a cluster of numerous long LTRs at the telocentric  
578 region of chromosome 10 and may represent a new LTR invasion.

579

### 580 **RNA-seq**

581 A transcriptomic RNA-seq analysis was performed comparing a population of 28 male  
582 buffalograss genotypes that were either infected or mock-infected with *S. buchloëana*  
583 teliospores. The genotypes utilized were the same 28 male genotypes evaluated in a previous  
584 study (Chandra and Huff, 2014). Immature (boot-stage) inflorescences, approximately 3 to 7 mm  
585 in length, were harvested from either infected or mock-infected plants in the afternoon (3-5 pm)  
586 every day for approximately three weeks and immediately placed in liquid nitrogen and stored at  
587 -80 C. After tissues were harvested, treatment combinations were pooled, lyophilized, and stored  
588 at -20 C for approximately six years. RNA was extracted from four biological replicates with  
589 tissue samples from each treatment for a total of eight RNA samples. RNA extractions were  
590 verified for adequate quality and concentration using a Bioanalyzer (Agilent Technologies,  
591 California, USA). Samples with an RNA Integrity Number (RIN) of 6.8 or higher were sent to  
592 the Pennsylvania State Genomics Core Facility for sequencing using an Illumina MiSeq and  
593 150×150 bp pair-end libraries.

594

595 Sequences were trimmed for adapters and low-quality ends using bbdduk with parameters ‘tbo tpe  
596 ktrim = r k = 23 mink = 11 hdist = 1’. Cleaned sequences from uninfected buffalograss and *S.*  
597 *buchloëana* grown in culture were input into the trinityrnaseq toolkit (v2.13.0; Haas *et al.*, 2013)  
598 to assemble *de novo* transcriptomes. Reads from infected plants contained both buffalograss and  
599 *S. buchloëana* sequences, and so they were subsequently aligned to the reference transcriptomes  
600 of both species to separate transcripts based on their species of origin (Supplementary Fig. 8).  
601 Kallisto (Bray *et al.*, 2016) and DESeq2 (Love *et al.*, 2014) were then executed using the  
602 trinityrnaseq scripts ‘align\_and\_estimate\_abundance.pl’ and ‘run\_DE\_analysis.pl’ to conduct the  
603 differential expression analysis. Functional annotations were assigned using Trinotate  
604 (trinityrnaseq toolkit) and the id2go formatted file was analyzed using the ‘analyze\_diff\_expr.pl’  
605 with the ‘-examine\_GO\_enrichment’ flag to call Goseq to examine functionally enriched gene  
606 ontologies. Gene ontologies were visualized using Revigo (Supek *et al.*, 2011) to cluster  
607 enriched ontologies by semantic similarity.

608

## 609 **Data Availability Statement**

610 Genome assembly and gene annotation files are publicly available through the CyVerse CoGe  
611 platform (<https://genomevolution.org/coge/>). Raw sequence data are available in the Sequence  
612 Read Archive under NCBI BioProject PRJNA961724.

613

## 614 **Conflicts of Interest**

615 The authors declare that they have no conflicts of interests.

616

## 617 **Acknowledgements**

618 None.

619

## 620 **Funder Information**

621 This work was supported by the Pennsylvania Turfgrass Council (PTC); and the Pennsylvania  
622 State University Huck Institute of Life Sciences; and the College of Agricultural Sciences [Hatch  
623 Project PA 4592]; and by the USDA National Institute of Food and Agriculture [Hatch project  
624 1023293].

## 625 **Literature Cited**

- 626 1. Almagro Armenteros JJ et al. 2019. SignalP 5.0 improves signal peptide predictions  
627 using deep neural networks. *Nat Biotechnol.* 37:420–423.
- 628 2. Bandi VK. 2020. SynVisio: A Multiscale Tool to Explore Genomic Conservation. Thesis,  
629 University of Saskatchewan.
- 630 3. Bateman A et al. 2004. The Pfam protein families database. *Nucleic Acids Res.*  
631 32:D138–D141.
- 632 4. Blin K et al. 2019. antiSMASH 5.0: updates to the secondary metabolite genome mining  
633 pipeline. *Nucleic Acids Res.* 47:W81–W87.
- 634 5. Bray NL, Pimentel H, Melsted P, Pachter L. 2016. Near-optimal probabilistic RNA-seq  
635 quantification. *Nat Biotechnol.* 34:525–527.
- 636 6. Britton T, Anderson CL, Jacquet D, Lundqvist S, Bremer K. 2007. Estimating  
637 Divergence Times in Large Phylogenetic Trees. *Systematic Biology.* 56:741–752.

- 638 7. Brůna T, Hoff KJ, Lomsadze A, Stanke M, Borodovsky M. 2021. BRAKER2: automatic  
639 eukaryotic genome annotation with GeneMark-EP+ and AUGUSTUS supported by a  
640 protein database. NAR Genomics and Bioinformatics. 3:lqaa108.
- 641 8. Buchfink B, Xie C, Huson DH. 2015. Fast and sensitive protein alignment using  
642 DIAMOND. Nat Methods. 12:59–60.
- 643 9. Cantarel BL et al. 2008. MAKER: an easy-to-use annotation pipeline designed for  
644 emerging model organism genomes. Genome Res. 18:188–196.
- 645 10. Capella-Gutiérrez S, Silla-Martínez JM, Gabaldón T. 2009. trimAl: a tool for automated  
646 alignment trimming in large-scale phylogenetic analyses. Bioinformatics. 25:1972–1973.
- 647 11. Carris LM, Castlebury LA, Goates BJ. 2006. Nonsystemic Bunt Fungi—*Tilletia indica*  
648 and *T. horrida*: A Review of History, Systematics, and Biology. Annual Review of  
649 Phyt pathology. 44:113–133.
- 650 12. Castlebury LA, Carris LM, Vánky K. 2005. Phylogenetic analysis of *Tilletia* and allied  
651 genera in order Tilletiales (Ustilaginomycetes; Exobasidiomycetidae) based on large  
652 subunit nuclear rDNA sequences. Mycologia. 97:888–900.
- 653 13. Cézilly F, Favrat A, Perrot-Minnot M-J. 2013. Multidimensionality in parasite-induced  
654 phenotypic alterations: ultimate versus proximate aspects. Journal of Experimental  
655 Biology. 216:27–35.
- 656 14. Chandra A, Huff DR. 2008. *Salmacisia*, a New Genus of Tilletiales: Reclassification of  
657 *Tilletia buchloëana* Causing Induced Hermaphroditism in Buffalograss. Mycologia.  
658 100:81–93.
- 659 15. Chandra A, Huff DR. 2010. A Fungal Parasite Regulates a Putative Female-Suppressor  
660 Gene Homologous to Maize *Tasselseed2* and Causes Induced Hermaphroditism in Male  
661 Buffalograss. MPMI. 23:239–250.
- 662 16. Chandra A, Huff DR. 2014. Pistil Smut Infection Increases Ovary Production, Seed Yield  
663 Components, and Pseudosexual Reproductive Allocation in Buffalograss. Plants. 3:594–  
664 612.
- 665 17. Darling ACE, Mau B, Blattner FR, Perna NT. 2004. Mauve: Multiple Alignment of  
666 Conserved Genomic Sequence With Rearrangements. Genome Res. 14:1394–1403.
- 667 18. Dawkins R. 2016. The Extended Phenotype: The Long Reach of the Gene. Oxford  
668 University Press.

- 669 19. Diner RE et al. 2017. Diatom centromeres suggest a mechanism for nuclear DNA  
670 acquisition. PNAS. 114:E6015–E6024.
- 671 20. Dobin A et al. 2013. STAR: ultrafast universal RNA-seq aligner. Bioinformatics. 29:15–  
672 21.
- 673 21. Duan X, Gimble FS, Quioco FA. 1997. Crystal Structure of PI-SceI, a Homing  
674 Endonuclease with Protein Splicing Activity. Cell. 89:555–564.
- 675 22. Edgar RC. 2004. MUSCLE: multiple sequence alignment with high accuracy and high  
676 throughput. Nucleic Acids Research. 32:1792–1797.
- 677 23. Felsenstein J. 1978. Cases in which Parsimony or Compatibility Methods will be  
678 Positively Misleading. Systematic Biology. 27:401–410.
- 679 24. Fryxell KJ, Zuckerkandl E. 2000. Cytosine Deamination Plays a Primary Role in the  
680 Evolution of Mammalian Isochores. Molecular Biology and Evolution. 17:1371–1383.
- 681 25. Green CM, Novikova O, Belfort M. 2018. The dynamic intein landscape of eukaryotes.  
682 Mobile DNA. 9:4.
- 683 26. Greiner S, Lehwark P, Bock R. 2019. OrganellarGenomeDRAW (OGDRAW) version  
684 1.3.1: expanded toolkit for the graphical visualization of organellar genomes. Nucleic  
685 Acids Research. 47:W59–W64.
- 686 27. Haas BJ et al. 2008. Automated eukaryotic gene structure annotation using  
687 EVIDENCEModeler and the Program to Assemble Spliced Alignments. Genome Biology.  
688 9:R7.
- 689 28. Haas BJ et al. 2013. *De novo* transcript sequence reconstruction from RNA-seq using the  
690 Trinity platform for reference generation and analysis. Nat Protoc. 8:1494–1512.
- 691 29. Hane JK, Oliver RP. 2008. RIPCAL: a tool for alignment-based analysis of repeat-  
692 induced point mutations in fungal genomic sequences. BMC Bioinformatics. 9:478.
- 693 30. Haug-Baltzell A, Stephens SA, Davey S, Scheidegger CE, Lyons E. 2017. SynMap2 and  
694 SynMap3D: web-based whole-genome synteny browsers. Bioinformatics. 33:2197–2198.
- 695 31. He M-Q et al. 2019. Notes, outline and divergence times of Basidiomycota. Fungal  
696 Diversity. 99:105–367.
- 697 32. Henry LP, Bruijning M, Forsberg SKG, Ayroles JF. 2021. The microbiome extends host  
698 evolutionary potential. Nat Commun. 12:5141.

- 699 33. Hood ME et al. 2010. Distribution of the anther-smut pathogen *Microbotryum* on species  
700 of the Caryophyllaceae. *New Phytol.* 187:217–229.
- 701 34. Huff DR, Zagory D, and Wu L. 1987. Report of buffalograss bunt found in Oklahoma.  
702 *Plant Disease.* 71:651.
- 703 35. Jayawardena RS et al. 2019. One stop shop II: taxonomic update with molecular  
704 phylogeny for important phytopathogenic genera: 26–50 (2019). *Fungal Diversity.*  
705 94:41–129.
- 706 36. Jiang RHY et al. 2013. Distinctive Expansion of Potential Virulence Genes in the  
707 Genome of the Oomycete Fish Pathogen *Saprolegnia parasitica*. *PLOS Genetics.*  
708 9:e1003272.
- 709 37. Jones DT, Taylor WR, Thornton JM. 1992. The rapid generation of mutation data  
710 matrices from protein sequences. *Comput Appl Biosci.* 8:275–282.
- 711 38. Kämper J et al. 2006. Insights from the genome of the biotrophic fungal plant pathogen  
712 *Ustilago maydis*. *Nature.* 444:97–101.
- 713 39. Katoh K, Standley DM. 2013. MAFFT Multiple Sequence Alignment Software Version  
714 7: Improvements in Performance and Usability. *Molecular Biology and Evolution.*  
715 30:772–780.
- 716 40. Kellerman WA, Swingle WT. 1889. New Species of Kansas Fungi. *The Journal of*  
717 *Mycology.* 5:11–49.
- 718 41. Kemler M et al. 2020. Host preference and sorus location correlate with parasite  
719 phylogeny in the smut fungal genus *Microbotryum* (Basidiomycota, Microbotryales).  
720 *Mycol Progress.* 19:481–493.
- 721 42. Kinney M, Columbus T, Friar E. 2007. Dicliny in *Bouteloua* (Poaceae: Chloridoideae):  
722 Implications for the Evolution of Dioecy. *Aliso.* 23:605–614.
- 723 43. Koren S et al. 2017. Canu: scalable and accurate long-read assembly via adaptive k-mer  
724 weighting and repeat separation. *Genome Res.* 27:722–736.
- 725 44. Kumar S, Stecher G, Li M, Knyaz C, Tamura K. 2018. MEGA X: Molecular  
726 Evolutionary Genetics Analysis across Computing Platforms. *Mol Biol Evol.* 35:1547–  
727 1549.
- 728 45. Lechner M et al. 2011. Proteinortho: Detection of (Co-)orthologs in large-scale analysis.  
729 *BMC Bioinformatics.* 12:124.



- 730 46. Leger RJS, Joshi L, Roberts DW. 1997. Adaptation of proteases and carbohydrases of  
731 saprophytic, phytopathogenic and entomopathogenic fungi to the requirements of their  
732 ecological niches. *Microbiology*. 143:1983–1992.
- 733 47. Li X-Q, Du D. 2014. Variation, Evolution, and Correlation Analysis of C+G Content and  
734 Genome or Chromosome Size in Different Kingdoms and Phyla. *PLOS ONE*. 9:e88339.
- 735 48. Long H et al. 2018. Evolutionary determinants of genome-wide nucleotide composition.  
736 *Nat Ecol Evol*. 2:237–240.
- 737 49. Love MI, Huber W, Anders S. 2014. Moderated estimation of fold change and dispersion  
738 for RNA-seq data with DESeq2. *Genome Biology*. 15:550.
- 739 50. Lowe TM, Eddy SR. 1997. tRNAscan-SE: A Program for Improved Detection of  
740 Transfer RNA Genes in Genomic Sequence. *Nucleic Acids Research*. 25:955–964.
- 741 51. Melters DP et al. 2013. Comparative analysis of tandem repeats from hundreds of species  
742 reveals unique insights into centromere evolution. *Genome Biology*. 14:R10.
- 743 52. Meyne J et al. 1990. Distribution of non-telomeric sites of the (TTAGGG)<sub>n</sub> telomeric  
744 sequence in vertebrate chromosomes. *Chromosoma*. 99:3–10.
- 745 53. Murray GM, Brenan JP. 1998. The risk to Australia from *Tilletia indica*, the cause of  
746 Karnal bunt of wheat. *Australasian Plant Pathology*. 27:212–225.
- 747 54. Muszewska A et al. 2017. Fungal lifestyle reflected in serine protease repertoire. *Sci Rep*.  
748 7:1–12.
- 749 55. Nagarajan S et al. 1997. Karnal bunt (*Tilletia indica*) of wheat - a review. *Review of*  
750 *Plant Pathology*. 76:8.
- 751 56. Park BH, Karpinets TV, Syed MH, Leuze MR, Uberbacher EC. 2010. CAZymes  
752 Analysis Toolkit (CAT): Web service for searching and analyzing carbohydrate-active  
753 enzymes in a newly sequenced organism using CAZy database. *Glycobiology*. 20:1574–  
754 1584.
- 755 57. Perlin MH et al. 2015. Sex and parasites: genomic and transcriptomic analysis of  
756 *Microbotryum lychnidis-dioicae*, the biotrophic and plant-castrating anther smut fungus.  
757 *BMC Genomics*. 16:461.
- 758 58. Piątek M, Riess K, Karasiński D, Yorou NS, Lutz M. 2016. Integrative analysis of the  
759 West African *Ceraceosorus africanus* sp. nov. provides insights into the diversity,

- 760 biogeography, and evolution of the enigmatic Ceraceosorales (Fungi:  
761 Ustilaginomycotina). *Org Divers Evol.* 16:743–760.
- 762 59. Poulin R. 2013. Parasite manipulation of host personality and behavioural syndromes.  
763 *Journal of Experimental Biology.* 216:18–26.
- 764 60. Puigbò P, Bravo IG, Garcia-Vallve S. 2008. CAIcal: A combined set of tools to assess  
765 codon usage adaptation. *Biol Direct.* 3:38.
- 766 61. Qin DD, Xu TS, Liu TG, Chen WQ, Gao L. 2021. First Report of Wheat Common Bunt  
767 Caused by *Tilletia laevis* in Henan Province, China. *Plant Disease.* 105:215.
- 768 62. Rawlings ND et al. 2018. The MEROPS database of proteolytic enzymes, their substrates  
769 and inhibitors in 2017 and a comparison with peptidases in the PANTHER database.  
770 *Nucleic Acids Res.* 46:D624–D632.
- 771 63. Selker EU, Stevens JN. 1985. DNA methylation at asymmetric sites is associated with  
772 numerous transition mutations. *Proceedings of the National Academy of Sciences.*  
773 82:8114–8118.
- 774 64. Shah NH, Muir TW. 2014. Inteins: Nature’s Gift to Protein Chemists. *Chem Sci.* 5:446–  
775 461.
- 776 65. Sharma R, Xia X, Riess K, Bauer R, Thines M. 2015. Comparative Genomics Including  
777 the Early-Diverging Smut Fungus *Ceraceosorus bombacis* Reveals Signatures of Parallel  
778 Evolution within Plant and Animal Pathogens of Fungi and Oomycetes. *Genome Biology*  
779 *and Evolution.* 7:2781.
- 780 66. Simão FA, Waterhouse RM, Ioannidis P, Kriventseva EV, Zdobnov EM. 2015. BUSCO:  
781 assessing genome assembly and annotation completeness with single-copy orthologs.  
782 *Bioinformatics.* 31:3210–3212.
- 783 67. Smith MM. 2002. Centromeres and variant histones: what, where, when and why? *Curr.*  
784 *Opin. Cell Biol.* 14:279–285.
- 785 68. Stamatakis A. 2014. RAxML version 8: a tool for phylogenetic analysis and post-analysis  
786 of large phylogenies. *Bioinformatics.* 30:1312–1313.
- 787 69. Stanke M et al. 2006. AUGUSTUS: *ab initio* prediction of alternative transcripts. *Nucleic*  
788 *Acids Research.* 34:W435–W439.

- 789 70. Storck R. 1966. Nucleotide composition of nucleic acids of fungi. II. Deoxyribonucleic  
790 acids. *J Bacteriol.* 91:227–230.
- 791 71. Sun G, Pourkheirandish M, Komatsuda T. 2009. Molecular evolution and phylogeny of  
792 the RPB2 gene in the genus *Hordeum*. *Ann Bot.* 103:975–983.
- 793 72. Supek F, Bošnjak M, Škunca N, Šmuc T. 2011. REVIGO summarizes and visualizes long  
794 lists of gene ontology terms. *PLoS One.* 6:e21800.
- 795 73. Tatusov RL et al. 2003. The COG database: an updated version includes eukaryotes.  
796 *BMC Bioinformatics.* 4:41.
- 797 74. Thomas F, Poulin R, Brodeur J. 2010. Host manipulation by parasites: a  
798 multidimensional phenomenon. *Oikos.* 119:1217–1223.
- 799 75. Tillich M et al. 2017. GeSeq – versatile and accurate annotation of organelle genomes.  
800 *Nucleic Acids Research.* 45:W6–W11.
- 801 76. Uchida W, Matsunaga S, Sugiyama R, Kazama Y, Kawano S. 2003. Morphological  
802 development of anthers induced by the dimorphic smut fungus *Microbotryum violaceum*  
803 in female flowers of the dioecious plant *Silene latifolia*. *Planta.* 218:240–248.
- 804 77. van Houte S, Ros VID, van Oers MM. 2013. Walking with insects: molecular  
805 mechanisms behind parasitic manipulation of host behaviour. *Molecular Ecology.*  
806 22:3458–3475.
- 807 78. van Wyk S et al. 2019. The RIPper, a web-based tool for genome-wide quantification of  
808 Repeat-Induced Point (RIP) mutations. *PeerJ.* 7:e7447.
- 809 79. Vinogradov AE. 2003. DNA helix: the importance of being GC-rich. *Nucleic Acids Res.*  
810 31:1838–1844.
- 811 80. Vyas A. 2015. Mechanisms of Host Behavioral Change in *Toxoplasma gondii* Rodent  
812 Association. *PLOS Pathogens.* 11:e1004935.
- 813 81. Wang A et al. 2018. The pathogenic mechanisms of *Tilletia horrida* as revealed by  
814 comparative and functional genomics. *Scientific Reports.* 8.
- 815 82. Wang Y et al. 2012. MCScanX: a toolkit for detection and evolutionary analysis of gene  
816 synteny and collinearity. *Nucleic Acids Research.* 40:e49–e49.
- 817 83. Werren JH. 2011. Selfish genetic elements, genetic conflict, and evolutionary innovation.  
818 *Proceedings of the National Academy of Sciences.* 108:10863–10870.

- 819 84. Wolfe KH, Sharp PM, Li WH. 1989. Mutation rates differ among regions of the  
820 mammalian genome. *Nature*. 337:283–285.
- 821 85. Wu P, van Overbeek M, Rooney S, de Lange T. 2010. Apollo Contributes to G Overhang  
822 Maintenance and Protects Leading-End Telomeres. *Molecular Cell*. 39:606–617.
- 823 86. Zhao R-L et al. 2017. A six-gene phylogenetic overview of Basidiomycota and allied  
824 phyla with estimated divergence times of higher taxa and a phyloproteomics perspective.  
825 *Fungal Diversity*. 84:43–74.
